# Supplementary material
Source: PubMed Central journal article supplement (PMC2626567)

**Supplemental tables and figures****Table 1. *S.cerevisiae* strains used in this study.**

| Strain                                       | Genotype/Phenotype                                                                                                                                            | Ref                                      |
|----------------------------------------------|---------------------------------------------------------------------------------------------------------------------------------------------------------------|------------------------------------------|
| <i>mcm5-461</i> <sup>#</sup>                 | <i>mcm5-461 ura3-52 leu2-3,112 ade2 lys2-801 MAT<math>\alpha</math></i>                                                                                       | (Dziak <i>et al.</i> , 2003)             |
| <i>MCM5</i> <sup>*</sup>                     | <i>mcm5-461::MCM5::LEU2 ura3-52 leu2-3,112 ade2 lys2-801 MAT<math>\alpha</math></i>                                                                           | (Dziak <i>et al.</i> , 2003)             |
| <i>W303</i> <sup>^</sup>                     | <i>ade2-1 trp1-1 can1-100 leu2-3,112 his3-11,15 ura3-1 MATa</i>                                                                                               |                                          |
| <i>orc2-1</i> <sup>^</sup>                   | <i>orc2-1 ade2-1 trp1-1 can1-100 leu2-3,112 his3-11,15 ura3-1 MATa</i>                                                                                        | (Ehrenhofer-Murray <i>et al.</i> , 1995) |
| <i>orc5-1</i>                                | <i>orc5-1 ade2-1 trp1-1 can1-100 leu2-3,112 his3-11,15 ura3-1 MATa</i>                                                                                        | (Ehrenhofer-Murray <i>et al.</i> , 1995) |
| <i>cdc45-1</i> <sup>^</sup>                  | <i>cdc45-1 ade2-1 trp1-1 can1-100 leu2-3,112 his3-11,15 ura3-1 MATa</i>                                                                                       | (Pasero <i>et al.</i> , 1999)            |
| <i>cdc6-1</i> <sup>^</sup>                   | <i>cdc6-1 ade2-1 trp1-1 can1-100 leu2-3,112 his3-11,15 ura3-1 MATa</i>                                                                                        | (Liang and Stillman, 1997)               |
| <i>cdc7-1</i> <sup>^</sup>                   | <i>cdc7-1 ade2-1 trp1-1 can1-100 leu2-3,112 his3-11,15 ura3-1 MATa ts at 37°C</i>                                                                             | (Pasero <i>et al.</i> , 1999)            |
| <i><math>\Delta</math>sir2</i>               | <i>sir2::TRP1 ade2-1 trp1-1 can1-100 leu2-3,112 his3-11,15 ura3-1 MATa</i>                                                                                    | (Rusche <i>et al.</i> , 2002)            |
| <i>LPY1030</i> <sup>^</sup>                  | <i>ade2-1 his3-11,15 leu2-3, 112 trp1-1 ura3-1 can1-100 MAT<math>\alpha</math> with telomeric adh4::URA3-UAS<sub>GAL</sub>-(C<sub>1-3A</sub>)<sub>n</sub></i> | (Jacobson and Pillus, 2004)              |
| <i>LPY1029</i> <sup>^</sup>                  | <i>LPY1030, except lacking the telomeric UAS<sub>GAL</sub> tethering site</i>                                                                                 | (Jacobson and Pillus, 2004)              |
| <i>GF100</i> <sup>^</sup>                    | <i>ade2-1 trp1-1 can1-100 leu2-3,112 his3-11,15 ura3-1 MATa with telomeric adh4::URA3-UAS<sub>GAL</sub>-TRP1-STAR-(C<sub>1-3A</sub>)<sub>n</sub></i>          | (Fourel <i>et al.</i> , 2002b)           |
| <i>BY4742</i>                                | <i><math>\Delta</math>hat1 his3<math>\Delta</math>1 leu2<math>\Delta</math>0 lys2<math>\Delta</math>0 ura3<math>\Delta</math>0 MAT<math>\alpha</math></i>     | ATCC #4040004                            |
| <i><math>\Delta</math>hat1</i> <sup>**</sup> | <i><math>\Delta</math>hat1 his3<math>\Delta</math>1 leu2<math>\Delta</math>0 lys2<math>\Delta</math>0 ura3<math>\Delta</math>0 MAT<math>\alpha</math></i>     | ATCC#4012827                             |
| <i><math>\Delta</math>gcn5</i> <sup>**</sup> | <i><math>\Delta</math>gcn5 his3<math>\Delta</math>1 leu2<math>\Delta</math>0 lys2<math>\Delta</math>0 ura3<math>\Delta</math>0 MAT<math>\alpha</math></i>     | ATCC#4017285                             |
| <i><math>\Delta</math>sas2</i> <sup>**</sup> | <i><math>\Delta</math>sas2 his3<math>\Delta</math>1 leu2<math>\Delta</math>0 lys2<math>\Delta</math>0 ura3<math>\Delta</math>0 MAT<math>\alpha</math></i>     | ATCC#4016568                             |
| <i><math>\Delta</math>sas3</i> <sup>**</sup> | <i><math>\Delta</math>sas3 his3<math>\Delta</math>1 leu2<math>\Delta</math>0 lys2<math>\Delta</math>0 ura3<math>\Delta</math>0 MAT<math>\alpha</math></i>     | ATCC#4013078                             |

\* These strains are derivatives of 8534-8C (Maine *et al.*, 1984; Hennessy *et al.*, 1991)

# This strain is identical to *cdc46-1* in (Dalton and Hopwood, 1997)

<sup>^</sup>These strains are derivatives of *W303*

\*\*These strains are derivatives of *BY4742*

**Table 2. FOA<sup>R</sup> cells in ARS1-URA3-tel, ARS1(ACS<sup>-</sup>)-URA3-tel, ARS1(B1<sup>-</sup>)-URA3-tel, URA3-ARS1-tel, URA3-ARS1(B1<sup>-</sup>)-tel.**

| Strains         | ARS1-URA3-tel    | ARS1(ACS <sup>-</sup> )-<br>URA3-tel | ARS1(B1 <sup>-</sup> )-<br>URA3-tel | URA3-ARS1-tel   | URA3-ARS1(B1 <sup>-</sup> )<br>- tel |
|-----------------|------------------|--------------------------------------|-------------------------------------|-----------------|--------------------------------------|
| <i>MCM5</i>     | 56.7 ±7.0 (n=8)  | 45.5 ±7.8 (n=5)                      | 89.0 ±7.8 (n=5)                     | 56.1 ±7.9 (n=4) | 80.0 ±5.1 (n=4)                      |
| <i>W303</i>     | 56.7 ±7.9 (n=8)  | 38.4 ±6.7 (n=7)                      | 96.0 ±6.7 (n=5)                     | 33.2 ±6.3 (n=9) | 70.0 ±7.3 (n=4)                      |
| <i>mcm5-461</i> | 80.0 ±6.1 (n=8)  | 36.5 ±3.2 (n=4)                      | 77.0 ±3.2 (n=4)                     | 57.0 ±5.3 (n=3) | 81.0 ±6.6 (n=3)                      |
| <i>orc2-1</i>   | 77.0 ±6.2 (n=6)  | 0.2 ±0.2 (n=3)                       | 83.0 ±0.2 (n=3)                     | 91.3 ±4.3 (n=4) | 88.0 ±5.2 (n=4)                      |
| <i>orc5-1</i>   | 83.0 ±4.0 (n=7)  | 0.1 ±0.1 (n=4)                       | 83.0 ±0.1 (n=4)                     | 94.9 ±3.9 (n=4) | 99.0 ±5.4 (n=4)                      |
| <i>cdc45-1</i>  | 81.0 ±9.0 (n=6)  | 28.4 ±5.7 (n=4)                      | 64.0 ±5.7 (n=4)                     | 85.1 ±5.1 (n=4) | 52.0 ±5.9 (n=5)                      |
| <i>Δsas2</i>    | 42.7 ±9.3 (n=3)  | 13.6 ±5.7 (n=3)                      | n/a                                 | n/a             | n/a                                  |
| <i>cdc7-1</i>   | 63.0 ±12.0 (n=6) | 32.0 ±6.9 (n=3)                      | 86.0 ±6.4 (n=4)                     | n/a             | n/a                                  |
| <i>cdc6-1</i>   | 30.3 ±7.1 (n=4)  | 67.7 ±6.4 (n=4)                      | 86.0 ±6.4 (n=4)                     | 55.3 ±9.6 (n=4) | 78.0 ±9.5 (n=4)                      |
| <i>Δsir2</i>    | 0.01 ±0.01 (n=3) | 0.02 ±0.01 (n=3)                     | 0.02 ±0.01 (n=3)                    | 0.02 ±0.01(n=3) | 0.01 ±0.01(n=3)                      |

Per cent FOA<sup>R</sup> cells in the constructs indicated above each column was measured in each of the cell strains indicated on the left. The average numbers for *n* triplicate measurements (shown in parenthesis) and the standard errors are shown.

**Table 3. FOA<sup>R</sup> cells in GF6, GF6(ACS<sup>-</sup>), GF6(B1<sup>-</sup>), GF44, GF44(ACS<sup>-</sup>) GF44(B1<sup>-</sup>).**

| Strains  | GF6               | GF6(ACS <sup>-</sup> )  | GF6(B1 <sup>-</sup> )  |
|----------|-------------------|-------------------------|------------------------|
| MCM5     | 48.6 ±8.5 (n=5)   | 42.0 ±2.6 (n=3)         | 48.0 ±7.9 (n=3)        |
| W303     | 63.5 ±9.3 (n=3)   | 58.0 ±7.8 (n=7)         | 64.4 ±6.5 (n=7)        |
| mcm5-461 | 9.0 ±1.3 (n=6)    | 35.7 ±2.4 (n=4)         | 89.7 ±3.3 (n=4)        |
| orc2-1   | 1.9 ±0.9 (n=5)    | 45.5 ±7.6 (n=4)         | 89.2 ±3.5 (n=4)        |
| orc5-1   | 29.2 ±8.7 (n=2)   | 50.2 ±9.8 (n=6)         | 90.5 ±3.3 (n=6)        |
| cdc45-1  | 5.3 ±3.1 (n=2)    | 28.4 ±5.5 (n=4)         | 31.3 ±6.9 (n=4)        |
| Δsas2    | 50.9 ±9.9 (n=3)   | 4.8 ±3.0 (n=3)          | n/a                    |
| cdc7-1   | 34.7 ±8.9 (n=3)   | 60.0 ±6.0 (n=4)         | 35.6 ±6.0 (n=4)        |
| cdc6-1   | 61.2 ±7.2 (n=5)   | 49.5 ±5.2 (n=5)         | 72.2 ±3.9 (n=5)        |
| Δsir2    | 0.03 ±0.001 (n=2) | 0.02 ±0.001 (n=3)       | 0.03 ±0.001(n=3)       |
|          | GF44              | GF44(ACS <sup>-</sup> ) | GF44(B1 <sup>-</sup> ) |
| MCM      | 75.5 ±9.5 (n=5)   | 40.3 ±6.5 (n=6)         | 57.9 ±5.1 (n=6)        |
| W303     | 68.5 ±9.7 (n=3)   | 41.1 ±7.9 (n=9)         | 51.8 ±6.0 (n=9)        |
| mcm5-461 | 9.1 ±3.7 (n=6)    | 35.7 ±6.3 (n=5)         | 75.0 ±5.2 (n=5)        |
| orc2-1   | 31.8 ±1.1 (n=3)   | 47.6 ±5.6 (n=5)         | 61.3 ±7.2 (n=5)        |
| orc5-1   | 19.6 ±7.1 (n=2)   | 37.3 ±4.2 (n=8)         | 63.4 ±7.3 (n=8)        |
| cdc45-1  | 7.5 ±4.0 (n=2)    | 56.1 ±6.8 (n=4)         | 62.8 ±5.7 (n=4)        |
| Δsas2    | 53.1 ±8.9 (n=3)   | 8.5 ±4.3 (n=3)          | n/a                    |
| cdc7-1   | 36.6 ±9.1 (n=2)   | 62.0 ±2.6 (n=4)         | 55.9 ±9.2 (n=6)        |
| cdc6-1   | 27.9 ±9.4 (n=5)   | 55.1 ±5.6 (n=4)         | 41.5 ±5.6 (n=4)        |
| Δsir2    | 0.02 ±0.001 (n=3) | 0.02 ±0.001 (n=3)       | 0.02 ±0.01 (n=3)       |

Per cent FOA<sup>R</sup> cells in the constructs indicated above each column was measured in each of the cell strains indicated on the left. The average numbers for *n* triplicate measurements (shown in parenthesis) and the standard errors are shown.

**Table 4. FOA<sup>R</sup> cells in GF6(ACS<sup>-</sup>ΔSTAR) and GF6(B1<sup>-</sup>ΔSTAR).**

| Strains  | GF6(ACS <sup>-</sup> ΔSTAR) | GF6(B1 <sup>-</sup> ΔSTAR) |
|----------|-----------------------------|----------------------------|
| MCM5     | 64.5 ±8.6 (n=3)             | 70.2 ±6.4 (n=3)            |
| W303     | 52.2 ±9.8 (n=3)             | 55.1 ±8.3 (n=3)            |
| mcm5-461 | 58.3 ±8.3 (n=3)             | 76.8 ±7.1 (n=3)            |
| orc2-1   | 20.1 ±3.0 (n=6)             | 30.8 ±7.2 (n=6)            |
| orc5-1   | 35.5 ±7.4 (n=6)             | 41.0 ±7.0 (n=6)            |
| cdc45-1  | 40.1 ±7.9 (n=5)             | 53.2 ±7.2 (n=5)            |

Per cent FOA<sup>R</sup> cells in the constructs indicated above each column was measured in each of the cell strains indicated on the left. The average numbers for *n* triplicate measurements (shown in parenthesis) and the standard errors are shown.

**Table 5A. FOA<sup>R</sup> in W303/URA-UAS<sub>GAL</sub>-tel, LPY1029 and LPY1030 cells expressing GBD-fusion proteins.**

| <b>URA3-UAS<sub>GAL4</sub>-tel</b>           | <b>%FOA<sup>R</sup> Cells</b> |
|----------------------------------------------|-------------------------------|
| GBD                                          | 22.0 ±4.9 (n=3)               |
| GBD-ORC1                                     | 23.1 ±7.8 (n=3)               |
| GBD-ORC2                                     | 39.3 ±9.8 (n=3)               |
| GBD-MCM10                                    | 86.5 ±8.3 (n=3)               |
| GBD-mcm10-1                                  | 57.2 ±6.5 (n=3)               |
| GBD-SIR1                                     | 75.7 ±6.3 (n=3)               |
| GBD-MCM5                                     | 5.5 ±2.0 (n=3)                |
| GBD-mcm5-1                                   | 8.8 ±2.8 (n=3)                |
| GBD-mcm5-461                                 | 10.6 ±3.2 (n=3)               |
| GBD-mcm5(bob1-1)                             | 28.8 ±13.4 (n=6)              |
| GBD-MCM3                                     | 56.3 ±7.9 (n=3)               |
| <b>URA3-tel(LPY1029)</b>                     |                               |
| GAL4DBD-Orc1p                                | 23.4 ±11 (n=6)                |
| GAL4DBD-Mcm5-461p                            | 58.9 ±7 (n=6)                 |
| GAL4DBD-Mcm5-1p                              | 40.9 ±14 (n=6)                |
| GAL4DBD-Mcm5p                                | 19.3 ±4 (n=6)                 |
| GAL4DBDp                                     | 59.0 ±10 (n=6)                |
| <b>URA3- UAS<sub>GAL4</sub>-tel(LPY1030)</b> |                               |
| GAL4DBD-Orc1p                                | 58.60 ±12 (n=6)               |
| GAL4DBD-Mcm5-461p                            | 1.94 ±0.4 (n=6)               |
| GAL4DBD-Mcm5-1p                              | 0.80 ±0.1 (n=6)               |
| GAL4DBD-Mcm5p                                | 0.61 ±0.1 (n=6)               |
| GAL4DBDp                                     | 36.39 ±10 (n=6)               |

Per cent FOA<sup>R</sup> cells transformed with vectors expressing the recombinant proteins presented on the left. The average numbers for *n* triplicate measurements (shown in parenthesis) and the standard errors are shown. W303/ URA-UAS<sub>GAL</sub>-tel contains four UAS<sub>GAL</sub> sites, while LPY1030 contains one UAS<sub>GAL</sub> site.

**Table 5B. FOA<sup>R</sup> in HAT deletion mutants harboring URA-UAS<sub>GAL</sub>-tel and expressing GBD or GBD-Mcm5p.**

| <b>Strains</b> | <b>Protein</b> | <b>%FOA<sup>R</sup> cells</b> |
|----------------|----------------|-------------------------------|
| <i>Δhat1</i>   | GBD            | 95.1 ±3.1(n=3)                |
|                | GBD-Mcm5p      | 93.2 ±3.4(n=3)                |
| <i>Δgcn5</i>   | GBD            | 84.7 ±7.1(n=3)                |
|                | GBD-Mcm5p      | 85.6 ±5.6(n=3)                |
| <i>Δsas2</i>   | GBD            | 94.3 ±3.1(n=3)                |
|                | GBD-Mcm5p      | 53.7 ±7.4(n=3)                |
| <i>Δsas3</i>   | GBD            | 95.6 ±2.8(n=3)                |
|                | GBD-Mcm5p      | 36.9 ±7.2(n=3)                |
| <i>wt</i>      | GBD            | 75.8 ±8.7(n=3)                |
|                | GBD-Mcm5p      | 13.7 ±6.2(n=3)                |

The average %FOA<sup>R</sup> for *n* triplicate measurements (shown in parenthesis) and the standard errors are shown.

**Table 6. FOA<sup>R</sup>, TRP<sup>+</sup> and FOA<sup>R</sup>&TRP<sup>+</sup> cells in *GF100* and *GF100 Δrif1*.**

| <i>GF100</i>     | % FOA <sup>R</sup> | %TRP <sup>+</sup> | TRP <sup>+</sup> / FOA <sup>R</sup> |
|------------------|--------------------|-------------------|-------------------------------------|
| GAL4DBD-GCN5     | 0.31 ±0.10 (n=6)   | 80.01 ±5.1 (n=6)  | 0.04 ±0.02 (n=6)                    |
| GAL4DBD-ORC1     | 8.17 ±0.59 (n=6)   | 36.23 ±3.3 (n=6)  | 0.01 ±0.01 (n=6)                    |
| GAL4DBD-mcm5-461 | 0.22 ±0.17 (n=6)   | 94.1 ±8.8 (n=6)   | 0.02 ±0.01 (n=3)                    |
| GAL4DBD-mcm5-1   | 0.38 ±0.15 (n=6)   | 84.5 ±18.7 (n=6)  | 0.04 ±0.01 (n=3)                    |
| GAL4DBD-MCM5     | 0.71 ±0.37 (n=6)   | 91.4 ±1.2 (n=6)   | 0.03 ±0.004 (n=4)                   |
| GAL4DBD          | 3.42 ±0.26 (n=6)   | 68.5 ±4.0 (n=6)   | 0.01 ±0.01(n=6)                     |

| <i>GF100Δrif1</i>       | % FOA <sup>R</sup> | %TRP <sup>+</sup> | TRP <sup>+</sup> / FOA <sup>R</sup> |
|-------------------------|--------------------|-------------------|-------------------------------------|
| <i>GAL4DBD-GCN5</i>     | 23.02 ±2.02 (n=6)  | 48.4 ±6.2(n=6)    | 0.8 ±0.1 (n=6)                      |
| <i>GAL4DBD-ORC1</i>     | 74.9 ±3.18 (n=6)   | 5.01 ±1.9 (n=6)   | 0.4 ±0.05 (n=6)                     |
| <i>GAL4DBD-mcm5-461</i> | 57.6 ±6.41 (n=6)   | 19.6 ±3.1 (n=6)   | 0.4 ±0.1 (n=6)                      |
| <i>GAL4DBD-mcm5-1</i>   | 51.4 ±3.86 (n=6)   | 29.2 ±1.9 (n=6)   | 1.4 ±0.2 (n=6)                      |
| <i>GAL4DBD-MCM5</i>     | 23.7 ±2.12 (n=6)   | 45.6 ±6.2 (n=6)   | 1.0 ±0.1 (n=6)                      |
| <i>GAL4DBD</i>          | 70.8 ±3.41 (n=6)   | 5.8 ±1.2 (n=6)    | 1.7 ±0.2 (n=6)                      |

Cells transformed with vectors expressing the recombinant proteins presented on the left are shown. The average numbers for *n* triplicate measurements (shown in parenthesis) and the standard errors are shown.

**Supplemental Figure # 1:**

A) The sequence of *MCM5(CDC46)* is shown. The positions of the mutations in *mcm5-461* (G549) and *mcm5-1* (G1981) are shown in rectangles and bold script.

B) The amino acid sequence of Mcm5p is shown. The Zn-finger domain (amino acid residues 183-235) and the conserved heptad K/R repeat (amino acid residues 651-664) are highlighted in grey. The ATPase motif (MCM box) is underlined. The positions of the amino acid substitutions in Mcm5-461p (C183Y) and Mcm5-1p (E661K) are in rectangles and bold script.

**Comments to Supplemental Figure 1:** The mutation in *mcm5-461* (C183Y) is identical to the previously reported *cdc46-1* mutation (Dalton and Hopwood, 1997) and locates to the Zn-finger domain. It affects the interaction of Mcm5p with Mcm7p and the assembly of the MCM hexamer (Dalton and Hopwood, 1997). By homology with the archeal Mcm protein, this mutation is also expected to interfere with the association of the MCM hexamer with DNA (Fletcher *et al.*, 2003). The E661K mutation in *mcm5-1* locates in the conserved heptad K/R repeat. It has been postulated that this repeat provides a surface for interaction with other proteins, including other Mcm proteins (Kubota *et al.*, 1997).

A)

```

1   ATGTCATTTG ATAGACCGGA AATATACAGT GTCCTGTTT TACAAGGAGA
51  ATCTCCTAAC GACGATGATA ATACTGAAAT CATAAAGTCC TTTAAGAATT
101 TCATTTTGGG GTTCAGACTT GACTCGCAAT TTATTTACAG AGATCAGTTA
151 AGGAACAACA TCCTTGTGAA GAATTATTCT TTAACGGTTA ACATGGAGCA
201 TTTGATCGGA TATAACGAAG ACATATATAA GAAACTATCA GACGAACCTT
251 CAGATATCAT TCCATTATTC GAAACCGCGA TCACACAAGT GGCTAAAAGG
301 ATAAGTATTC TAAGCAGAGC TCAATCTGCT AATAACAATG ACAAAGATCC
351 AGAAAATACT AGTATGGATA CTGATTCTCT CTTATTGAAC TCTTTACCAA
401 CATTTCAATT AATTTTAAAC TCCAATGCAA ATCAGATTCC ATTGAGAGAT
451 TTGGATTCTG AACACGTCTC CAAGATTGTC CGTTTATCAG GTATTATAAT
501 ATCCACGTCA GTTTTATCTT CCCGTGCCAC GTACCTTTCT ATAATGTGCA
551 GAAATTGCAG ACACACAACA TCAATAACAA TCAACAATTT CAATTCTATC
601 ACAGGCAATA CCGTCAGTTT ACCACGTTCT TGCTTATCTA CGATTGAGAG
651 TGAATCTTCT ATGGCAAACG AGTCGAATAT TGGTGATGAA TCGACCAAGA
701 AAAATTGTGG ACCTGATCCA TATATTATTA TCCATGAGTC TTCAAAGTTT
751 ATTGATCAAC AGTTTTTAAA ATTACAGGAA ATCCCAGAAC TGGTTCCAGT
801 AGGTGAGATG CCTAGAAACT TAACAATGAC TTGTGACCGA TACCTAACAA
851 ACAAAGTTAT TCCTGGTACG AGAGTCACTA TAGTAGGTAT TTATTCCATC
901 TATAATTCTA AAAATGGTGC CGGATCCGGA AGGAGCGGGG GTGGAAATGG
951 AGGAAGTGGT GTTGCTATTA GAACACCTTA TATCAAATA TTAGGTATTC
1001 AGTCCGATGT AGAAACCTCC TCTATTTGGA ATTCAGTAAC TATGTTTACT
1051 GAGGAGGAAG AAGAGGAATT TCTACAGCTA AGTAGAAACC CGAAGCTTTA
1101 TGAAATTTTG ACCAACTCTA TTGCCCCCTC TATTTTGGT AATGAAGATA
1151 TAAAAAAGC CATTGTATGT TTATTGATGG GTGGTTCCAA GAAGATATTA
1201 CCCGATGGTA TGAGGTTAAG AGGTGATATC AATGTACTAT TATTAGGTGA
1251 TCCAGGTACC GCCAAATCTC AACTATTGAA ATTTGTGGAG AAAGTGTAC
1301 CTATTGCGGT ATATACATCT GGTAAGGGAT CTTCTGCAGC TGGGTTAACT

```

*ACS silencers convert to anti-silencers*

1351 GCCAGTGTAC AAAGAGATCC GATGACAAGA GAATTTTATT TGGAAGGTGG  
1401 TGCTATGGTG CTTGCCGATG GTGGTGTGTG ATGCATCGAT GAATTCGATA  
1451 AAATGAGAGA TGAAGATAGA GTGGCCATTC ATGAAGCTAT GGAGCAGCAA  
1501 ACAATCTCCA TCGCAAAAGC TGGTATCACT ACAGTGCTAA ATTCTAGAAC  
1551 TAGTGTTTTA GCGGCTGCTA ATCCGATATA CGGCCGGTAT GATGATTTGA  
1601 AGTCTCCTGG TGACAACATT GATTTCCAAA CTACTATTTT ATCCCGTTTT  
1651 GATATGATTT TTATTGTAA GGATGACCAT AATGAAGAAC GTGATATTTT  
1701 AATAGCTAAC CACGTTATTA ATATTCATAC AGGAAATGCT AATGCTATGC  
1751 AAAACCAACA AGAGGAAAAT GGCAGTGAAA TTAGTATTGA AAAGATGAAA  
1801 CGTTACATTA CGTATTGTAG ATTGAAATGT GCACCAAGAC TTTCACCGCA  
1851 GGCCGCTGAA AA**ACTGTCAT** CGAACTTCGT CACCATTAGG AAGCAATTAT  
1901 TAATCAACGA ATTAGAGTCA ACGGAAAGGT CGTCTATTCC AATTACCATT  
1951 CGTCAATTAG AAGCTATTAT TAGAATAACA **G**AATCATTAG CCAAGTTAGA  
2001 ATTAAGTCCT ATTGCACAGG AGAGACATGT TGACGAAGCT ATTAGATTGT  
2051 TTCAAGCTTC CACAATGGAC GCAGCGTCTC AGGATCCAAT TGGCGGCTTA  
2101 AATCAAGCAA GCGGAACATC TTTGTGAGAA ATCCGTCGTT TTGAACAAGA  
2151 ACTAAAAAGA AGATTACCTA TAGGCTGGTC TACTTCTTAT CAAACTTTGA  
2201 GGAGAGAATT TGTAGATACA CATAGATTTT CTCAATTAGC ACTGGATAAG  
2251 GCCTTATATG CCCTAGAGAA GCATGAAACA ATTCAATTGA GACACCAGGG  
2301 ACAGAATATT TACAGAAGTG GTGTATGA

**B)**

**1 MSFDRPEIYSAPVLQGESPNDDNTEIIKSFKNFILEFRL 40**  
**41 DSQFIYRDQLRNNILVKNYSLTVNMEHLIGYNEDIYKKL 79**  
**80 SDEPSDIPLFETAITQVAKRISILSRAQSANNNDKDPENTS 121**  
**122 MDTDSL LLLNSLPTFQLILNSNANQIPLRDL DSEHVSKIVR 161**  
**162 LSGIIISTSVLSSRATYLSIM **C**RNCRHTTSITINNFNSITG 201**  
**202 NTVSLPR SCLSTIESESSMet ANESNIGDESTKKKNC GPDPI 241**  
**242 IIHESKFKIDQQFLKLQEIPVPGEMPRNLMTCDRY 280**  
**281 LTNKVIPGTRVTIVGIYSIYNSKNGAGSGRSGGGNGGSGV 320**  
**321 AIRTPYIKILGIQSDVETSSIWNSVTMFTEEEEEEFLLQLS 360**  
**361 RNPKLYEILTNSIAPSIFGNEDIKKAI VCLLMGGSKKILP 400**  
**401 DGMRLRGDINVLLLGDPGTAKSQLLKFVEKVSPIAVYTS 439**  
**440 GKGSSAAGLTASVQRDPM TREFYLEGGAMVLADGGVV 476**  
**477 CID EFDKMRDEDRVAIHEAMEQQTISI AKAGITTVLNS 514**  
**515 RTSVLAANPIYGRYDDLKSPGDNIDFQTTILSRFDMIFI 554**  
**555 VKDDHNEERDISIANHVINIHTGNANAMQNQQEENGSEI 593**  
**594 SIEKMKRYITYCRLKCAPRLSPQAAEKLSNFVTIRKQLL 633**  
**634 INELESTERSSIPITIRQLEAIIRIT **E**SLAKLELSPIAQRHV 676**  
**677 DEAIRLFQASTMDAASQDPIGGLNQASGTSLSSEIRRFEQE 716**  
**717 LKRRLPIGWSTSYQTLRREFVDTHRFSQLALDKALYALEK 756**  
**757 H E T I Q L R H Q G Q N I Y R S G V Stop**  
**775**

**Supplemental Figure #2**

Wild type *W303* or *cdc7-1* cells harboring URA3-UAS<sub>GAL</sub>-tel (shown on the top) were transformed with plasmids carrying expression cassettes for the GBD-fusion proteins shown on the left. Per cent FOA<sup>R</sup> for each recombinant protein was acquired and average value and error are shown on the right. The ratio %FOA<sup>R</sup><sub>GAL4-fusion</sub> / %FOA<sup>R</sup><sub>GAL4DBD</sub> was calculated and plotted in the graph. Values below 1 indicate that the tethered proteins have anti-silencing activity and values above 1 indicate silencing activity.

**Comments to Supplemental Figure #2.** On-going research in our lab has shown that *cdc7-1* cells are very slow in exiting from repressed or de-repressed state at the telomere (slow recovery from SC-ura or SC/FOA plates, respectively). For this reason the experiments in *cdc7-1* were performed after selection on either SC-ura and SC/FOA plates followed by growth in non-selective medium to maintain the expressing plasmids but allow variegation of *URA3*. After 40 generations the assessment of % FOA was performed. Mcm5p does not show any anti-repression activity in *cdc7-1* regardless of the initial selection. Under the same experimental conditions Orc1p still acts as a repressor after initial selection was on SC-ura. We therefore believe that the lack of silencing activity in *cdc7-1* is not a consequence of the slow recovery phenotype but reflects an independent deficiency of the *cdc7-1* cells.

Additional note: the silencing activity of Orc1p is not evident after selection on SC/FOA because of the already high level (75%) of repression.

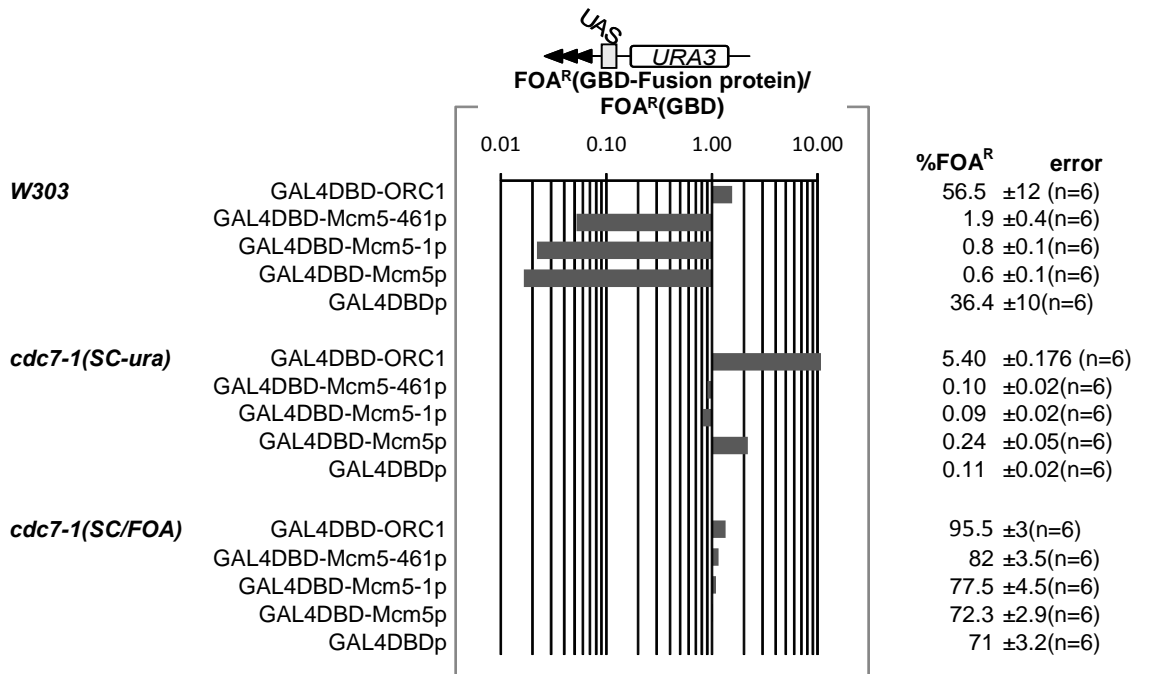

Supplement: E08-01-0099_1.pdf [file E08-01-0099_1.pdf]
